# Supplementary material
Source: ML conference proceedings conference paper supplement (https://proceedings.mlr.press/v97/papyan19a.html)
Supplement: Supplementary file [file papyan19a-supp.pdf]

# Measurements of Three-Level Hierarchical Structure in the Outliers in the Spectrum of Deepnet Hessians

## Appendix

|                                                                                   |                                                                                                                     |
|-----------------------------------------------------------------------------------|---------------------------------------------------------------------------------------------------------------------|
| $p$                                                                               | number of parameters                                                                                                |
| $C$                                                                               | number of classes                                                                                                   |
| $n$                                                                               | training examples                                                                                                   |
| $n_c$                                                                             | training examples per class                                                                                         |
| $x_{i,c}$                                                                         | $i$ -th example in $c$ -th class                                                                                    |
| $y_c$                                                                             | one hot vector corresponding to the $c$ -th class                                                                   |
| $\theta \in \mathbb{R}^p$                                                         | concatenation of all the parameters                                                                                 |
| $f(x_{i,c}; \theta) \in \mathbb{R}^C$                                             | logits (predictions prior to softmax) of $x_{i,c}$                                                                  |
| $f_{c'}(x_{i,c}; \theta) \in \mathbb{R}$                                          | $c'$ -th logit of $x_{i,c}$                                                                                         |
| $\frac{\partial f(x_{i,c}; \theta)}{\partial \theta} \in \mathbb{R}^{C \times p}$ | logit derivatives of $x_{i,c}$                                                                                      |
| $\frac{\partial f_{c'}(x_{i,c}; \theta)}{\partial \theta} \in \mathbb{R}^p$       | $c'$ -th logit derivative of $x_{i,c}$                                                                              |
| $p(x_{i,c}; \theta) \in \mathbb{R}^C$                                             | Softmax( $f(x_{i,c}; \theta)$ )                                                                                     |
| $p_{c'}(x_{i,c}; \theta) \in \mathbb{R}$                                          | $c'$ -th entry of Softmax( $f(x_{i,c}; \theta)$ )                                                                   |
| $\delta_{i,c,c'} \in \mathbb{R}^p$                                                | $\sqrt{p_{c'}(x_{i,c}; \theta)}(y_{c'} - p(x_{i,c}; \theta))^T \frac{\partial f(x_{i,c}; \theta)}{\partial \theta}$ |
| $\delta_{c,c'} \in \mathbb{R}^p$                                                  | Ave $_i \{ \delta_{i,c,c'} \}$                                                                                      |
| $\Sigma_{c,c'} \in \mathbb{R}^{p \times p}$                                       | Ave $_i \{ (\delta_{i,c,c'} - \delta_{c,c'}) (\delta_{i,c,c'} - \delta_{c,c'})^T \}$                                |
| $\delta_c \in \mathbb{R}^p$                                                       | Ave $_{c' \neq c} \{ \delta_{c,c'} \}$                                                                              |
| $\Sigma_c \in \mathbb{R}^{p \times p}$                                            | Ave $_{c' \neq c} \{ (\delta_{c,c'} - \delta_c) (\delta_{c,c'} - \delta_c)^T \}$                                    |
| $G_0 \in \mathbb{R}^{p \times p}$                                                 | Ave $_c \{ \delta_{c,c} \delta_{c,c}^T \}$                                                                          |
| $G_1 \in \mathbb{R}^{p \times p}$                                                 | $(C - 1)$ Ave $_c \{ \delta_c \delta_c^T \}$                                                                        |
| $G_2 \in \mathbb{R}^{p \times p}$                                                 | $(C - 1)$ Ave $_c \{ \Sigma_c \}$                                                                                   |
| $G_3 \in \mathbb{R}^{p \times p}$                                                 | $\frac{1}{C} \sum_{c,c'} \Sigma_{c,c'}$                                                                             |

Table 1: Summary of notations.

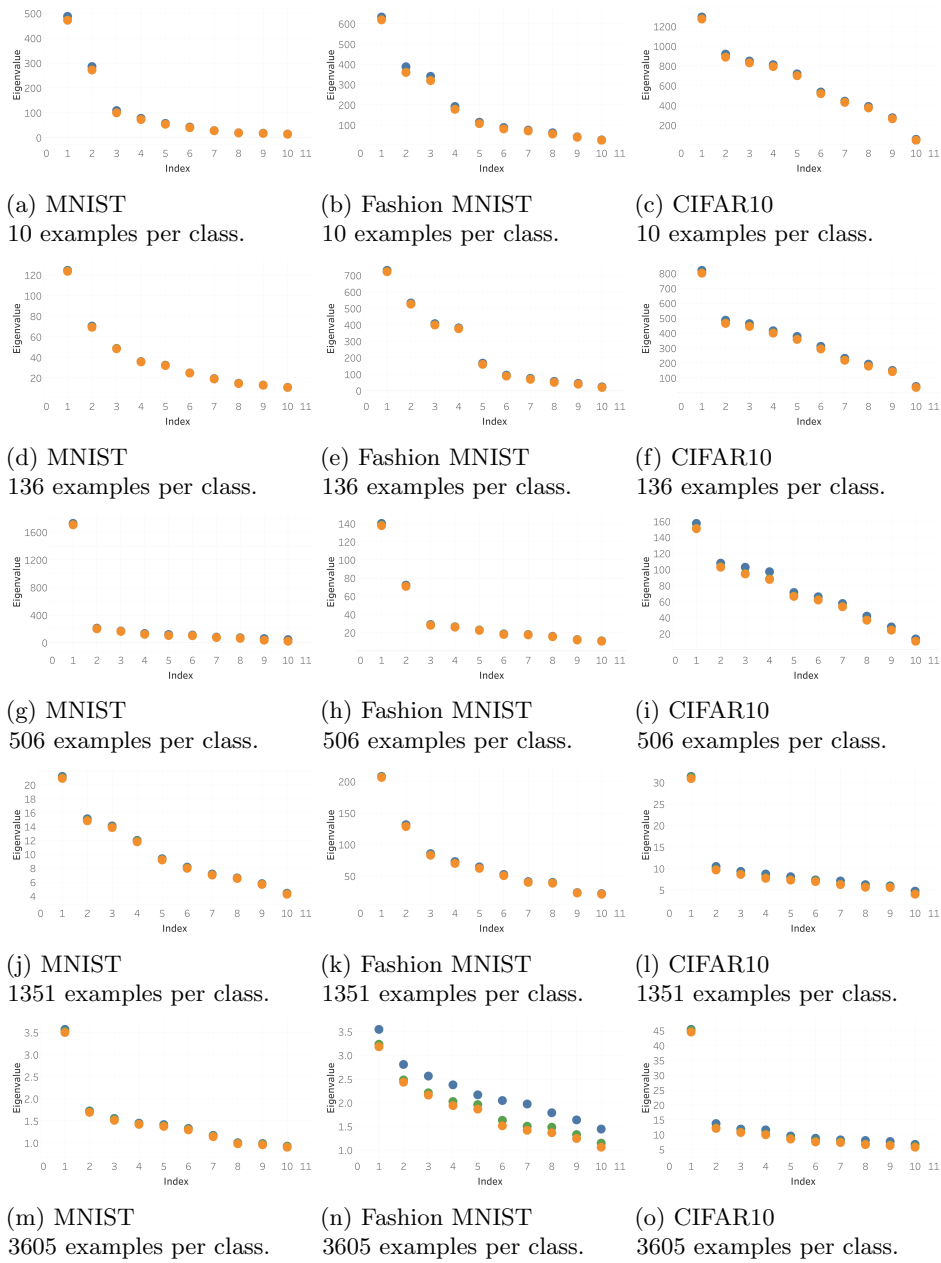

Figure 1: *Scree plots of  $G_1$ ,  $G_{1+2}$  and  $G$  for the VGG11 architecture.* Each column of panels corresponds to a different dataset, and each row to a different sample size. Each panel plots the top- $C$  eigenvalues of  $G_1$  in orange,  $G_{1+2}$  in green and  $G$  in blue. The top eigenvalues in  $G$  – which correspond to the outliers in the approximated spectrum of  $G$  – were computed using the LOWRANKDEFLECTION procedure. For every  $1 \leq c \leq C$ , we have  $\lambda_c(G) \geq \lambda_c(G_{1+2}) \geq \lambda_c(G_1)$ . Moreover,  $\lambda_c(G_{1+2})$  and  $\lambda_c(G_1)$  are usually very close.
